# Supplementary material for: Associations between neighborhood violence during pregnancy and birth outcomes: Evidence from São Paulo’s Western Region Birth Cohort
Source: Research Square preprint supplement (doi:10.21203/rs.3.rs-40469/v2), 2021-01-06
Supplement: Supplementary file 1 [file a9b47649a176fbfa7f28ddb9.docx]

**Supplementary Material**

**Supplementary file 1:** Postpartum questionnaire.

**Supplementary file 2:** Multiple imputations

**Table S1.** Missingness among variables used in the multiple imputation models.
